# Supplementary material for: Inadvertent human genomic bycatch and intentional capture raise beneficial applications and ethical concerns with environmental DNA
Source: PubMed Central journal article supplement (PMC10250199; doi:10.1038/s41559-023-02056-2), 2023-05-15
Supplement: 41559_2023_2056_MOESM1_ESM.pdf [file 41559_2023_2056_MOESM1_ESM.pdf]

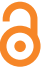

---

# Inadvertent human genomic bycatch and intentional capture raise beneficial applications and ethical concerns with environmental DNA

---

In the format provided by the authors and unedited

## Overview of sample types and sources used in this study

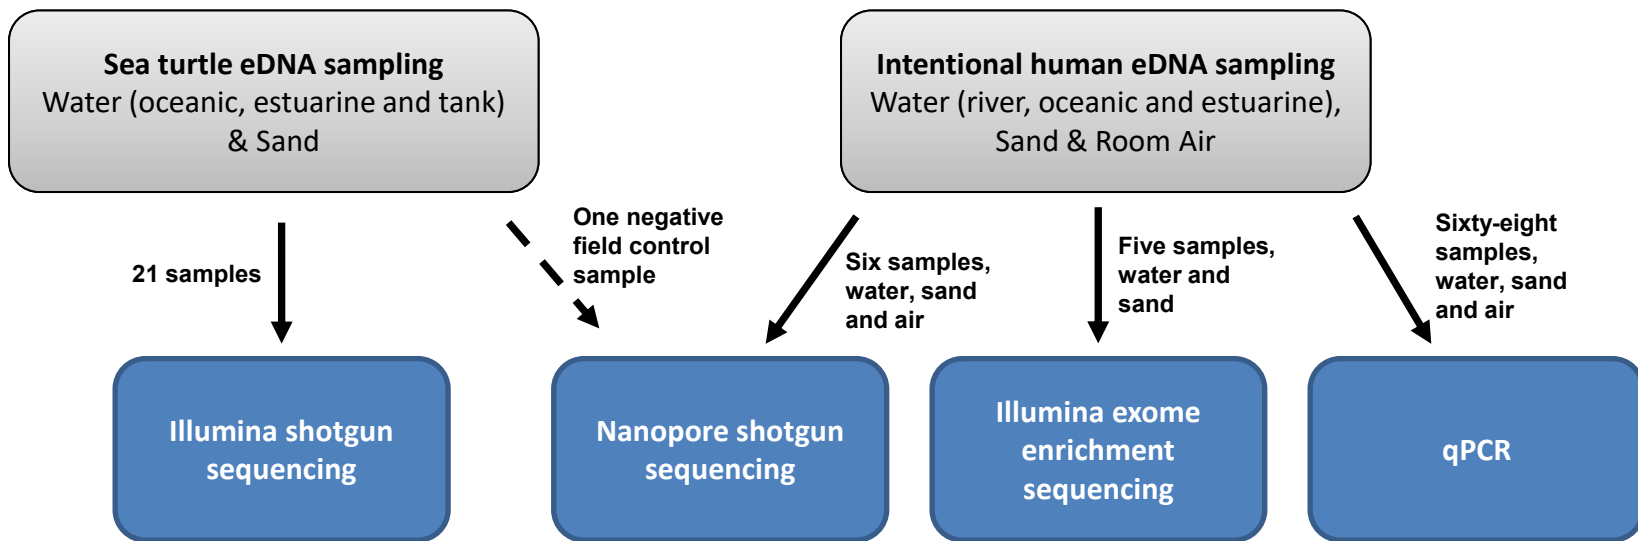

**Supplemental Figure 1.** Overview of the eDNA sample types and substrates and sources used in this study.
